# Supplementary material
Source: Research Square preprint supplement (doi:10.21203/rs.3.rs-6857172/v1)
Supplement: Supplementary file 1 [file 31170346421922848d0013c2.docx]

**IPROs Supplementary Table 3**

| Theme 3: Organisational mobility and choices | |
| --- | --- |
| Free Choice | **Forced Choice** |
| Most participants were very clear that being an iPro was a free choice for them. It was a planned and deliberate decision that offers flexibility and the ability to do something they enjoy:  *…I don’t want to do what my parents did, which is basically fall in a hole when they retired. I want to be able to work flexibly in my third career…It’s part of a long-term strategy of building a career in the teaching and consulting space… on already existing facilitation skills…motivated by that flexibility element … [and] a natural altruistic element as well, which is very much values-driven. It’s completely free. If I didn’t like it, I’d leave tomorrow… it also lines up with future plans…and personal intrinsic motivations…all those things dovetailing together.* [OMGT2]  *…so with a combination of the knowledge that I have, the online environment’s providing me with added opportunity to be able to do something that I enjoy…it’s very much a free choice… I’m 52 now …when I get to 55/56 I’d like to move away from what I’m doing in my full-time role… I see this as an opportunity to be able to work in this capacity until I retire… it’s very flexible…I’ve got an elderly mum… my sisters and I kind of juggle trying to get her from A to B and doing different things for her… work-life balance becomes important… as it becomes more demanding I’d like to be able to not have to worry about the full-time role. I’ve got to work hard for one or two or three years but then once I’ve sorted out a few personal things then I can pull back… I won’t be under pressure to be earning what I’m earning now because I won’t need to.* [MKT3]  *It’s something I absolutely love doing…my wife said to me why do you keep doing that? I like it.* [FIN2] | Only one participant felt that being an iPro was a completely forced choice. It offered no career trajectory for them, although there were some benefits personally:  ‘*...my wife’s career has taken off…I’ve been the one who’s been a bit more flexible, spending time with the kids and doing kid-related stuff. So, the portfolio work is attractive to me in that sense. I’ve fallen into that role [of iPro]...I’m just bouncing along. I get some interesting projects to do. I get some interesting things to teach but there’s no career trajectory….I feel very trapped in the portfolio work because I don’t publish, I don’t go to conferences because I can’t afford to. I work from home, so I don’t have good networks. I feel trapped in the portfolio work. I’m unlikely to get a full-time permanent job anywhere else, again….I’m too old. I’ve been doing…portfolio work for too long.*  [HRM1]  **Combination of free and forced choice**  For two participants it was a combination of free and forced choice:  *…it was [initially] a forced choice because I wanted to work around the kids. I have three kids, two of whom have very high needs, so being in a full-time role, 24/7, physically in an office somewhere is not possible….but at this stage, it’s probably more of a free choice… Part of that is my age and that I have other things going on as well, apart from the kids,… I don’t want to be full-time 24/7 in the corporate office.* [HRM2]  *…Initially [forced] choice because a lot of us were told that our services were no longer required on a permanent basis…[however] I was [later] contacted to see if I would be interested in sessional work. It’s certainly not a forced choice [now] because I do have the option of not working…but, I did choose to take the work…I still wanted to work…to be involved. I love being in education, I love the constant information flow..it allows me to still be involved but not tied to a full-time position*. [FIN1] |
