# Supplementary material
Source: Research Square preprint supplement (doi:10.21203/rs.3.rs-6857172/v1)
Supplement: Supplementary file 2 [file 9a7b2d1577676663f5e680c3.docx]

**IPROs Supplementary Table 2**

| Theme 2: Career Motivations | |
| --- | --- |
| Pro Entry | **Motivations** |
| Participants saw their education background and experience as a good fit for working as an iPro:  *...I did a teaching degree, so worked as a teacher for 15 years and then I worked in global HR…and, I’ve done some adult ed work, so I feel it’s a good fit for me.* [HRM2]  *…I’ve worked in the university sector for most of my life…I did my Masters, that’s when I really developed a passion for learning and the desire to effectively want to teach.* [MKT3]  Overtime, they built a portfolio of work, taking advantage of education models that were moving online:  *It took me a while…I think I just fell into it, a casual job here, not enough hours, a few more hours somewhere else, and over time you build up a portfolio.* [HRM1]  *… it’s a complete new world…when I had the experiences in initial online delivery…that increased my appetite for it*. [MKT3]  *…The fact that this is remote is easier for me to work in. If it was going to be face-to-face in a classroom, I wouldn’t be doing it because I can’t – it’s too hard, takes too much time.* [HRM2] | Primary motivations that drove participants to pursue work as an iPro were the desire for flexibility and a passion for teaching and facilitating learning that gave them a sense of purpose and fulfilment:  *Number one would be flexibility. Number two is flexibility.* [MKT2]  *A lot of it has been the flexibility, given that I do live on Tambourine Mountain and I can manage it from home.* [MKT1].  *…I like the flexibility. I like the fact that I can work school hours and when the kids have gone to bed, I can maybe do a bit more work.* [HRM1]  *I enjoy the interaction with students and I like facilitating learning. If teaching is done well at uni level, it can be quite an influencing vocation…So that purposeful element of it, from a motivational perspective, makes it easier to take on some of the other bits that aren’t as easy.* [HRM2]  …*the biggest benefit is the flexibility, being able to keep my hand in and still be involved but being able to do it at a time that suits me.* [FIN1]  Monetary rewards were not a primary driver:  *…you don’t do it for the money…I see it as a bit of giving back.* [MKT2]  *...I’m not motivated by money. I’m motivated by learning, I’m motivated by helping others, I’m motivated by self- fulfilment and achievement.* [OMGT2] |
