# Supplementary material
Source: Research Square preprint supplement (doi:10.21203/rs.3.rs-6857172/v1)
Supplement: Supplementary file 3 [file d24cf8fe9e0bd3aca9f89843.docx]

**IPROs Supplementary Table 5**

| Theme 5: Organisational support (OS) | |
| --- | --- |
| OS expectations | **OS received** |
| Overall, participants recognised the transactional nature of their engagement with higher education providers. Consequently, they had very low expectations of organisational support:  *I just think of it as a client…it’s very transactional…there’s no commitment to me…I could not get work for a semester…you just get this one email that pops up one day and says, “Hi, we’d like to offer you X subject”...then you don’t hear from anyone again until another day when you might get another one of those (emails).* [HRM2]  *To a degree, I was thrown in the deep end… I was really okay with that, but...I would have liked to have some more tuition around it [marking and feedback].* [OMGT2]    If any organisational support was received, it exceeded expectations:  *[AIB] sent me on this course…it’s a bit sad that the bar is so low that training that you would accept as a normal part of your employment relations had me doing cartwheels…I’m overjoyed…I just can’t believe they asked me to do it…I was so happy I learnt so much…such a positive experience.* [HRM1] | While one participant, who had been a portfolio worker for more than 10 years, felt higher education providers were generally only interested in ‘mining human intellectual capital’ [1HRM], they and other participants expressed appreciation for the following organisational support received from the institution:   - Setting clear expectations from the start, for example, regarding student response times [OMGT1] - A required online orientation program for OLFs [OMGT2, MKT2] - Professional development opportunities, including:   - Invitations to attend the weekly Academic Seminar and fortnightly Teaching and Learning Round Table [OMGT1, HRM2, MKT2]   - Invitations to join working groups and research teams [OMGT1, MKT2]   - Paid training (Quality Matters) [HRM1, MKT2, FIN2] - Support of Subject Coordinator, for example, to answer queries and keep on top of students at risk during the delivery of subjects [OMGT1, HRM2, FIN2] - Tools, such as drafted communications to students, checklists and slide decks for use in the delivery of subjects [OMGT1, HRM2] - Weekly teaching team meetings to discuss what’s going on during delivery of subjects [OMGT1] - Direct contact with technical specialists, for example, online learning support and librarian [MKT2] |
| Additional types and forms of OS desired |  |
| Generally, participants saw themselves as *“independent….self-driven”* [MKT2]and *“pretty self-sufficient”* [OMGT2]*.* However, more responsive organisational support was wanted to get set up. For example, with email access and how to use the marking portal, participants found, *“ … the systems at first were a bit opaque…trying to work it out…I did it basically all by intuition.”* [OMGT3]Overall, *“ ...it was really irritating at the very beginning…you’d ring…and it would just go through to voicemail all the time.”* [OMGT3]  More responsive ongoing organisational support was also wanted to respond, in turn, to student queries:  *…I sent a note straight to [the librarian] and she’s fixed it now….things need to be fixed quickly and going through the unit coordinator is not always the best way. [MKT2]*  *...I’ve got to know various people within the place now, so I’m quite comfortable in terms of knowing where to go and get help.* [MKT3]  *“The new OLFs need a buddy who is within the OLF group…that would really help.”* [MKT1]  Some training in the expected role of a facilitator would be appreciated. A participant suggested modelling through, *“...some sort of mentorship for new OLFs would probably be handy”* [OMGT2]*,* which could avoid potential issues. For example, a participant lamented*, “...if I’d known a bit more before I started…I would’ve chosen some different engagement strategies with students.”* [OMGT1]  Ongoing professional development was desired, *“Even though it’s the gig economy…it’s still a space where you must provide the ability for people to develop in the roles they’re actually in.”* [OMGT1] Keeping up to date with training in academic integrity was one area of particular importance mentioned by two participants. [OMGT1 & HRM1]. Access to conference funding and incentives for publishing were mentioned by another participant. [HRM1]  Building two-way, collaborative relationships was important. In “*some sort of connection with other people”* [HRM2] and *“...being part of a bigger picture…”* [HRM2], there was a desire, for example, for working in the same teaching teams from term to term [HRM2], for team-teaching with peers [MKT2], for getting to know all the academic and support staff [MKT2], being invited to teaching development programs, regardless of how many subjects are taught in a year [MKT2] and being kept up to date with changes in the institute [FIN2].  Feeling valued in a loyal relationship was important:  *It’s not just a transactional contract. There’s more to the relationship than, ‘This is what we want you to do,’ and ‘This is how much we’re going to pay you, and we’ll have a bit of a performance management at the end.’ We have a psychological contract, too….make it clear that we’re in a relationship and if you’re loyal to us, we’ll be loyal to you…* [HRM1]  Being rewarded with assurances of continuity of work (permanent part-time rather than casual) was an important aspect of this loyal relationship for some participants. [HRM1, HRM2]  Finally, a participant suggested having *“...someone who is actually looking after the contingent worker”* [HRM2] could be something to consider. | |
