# Supplementary material
Source: Research Square preprint supplement (doi:10.21203/rs.3.rs-6857172/v1)
Supplement: Supplementary file 4 [file d254c47a7ac9343fdc6b363d.docx]

**IPROs Supplementary Table 1**

| Theme 1: Career self-management | |
| --- | --- |
| Influencing factors |  |
| Most participants indicated the decision to work as an iPro in tertiary education revolves around the pursuit of an autonomous, flexible and purpose-driven lifestyle that aligns with personal interests, responsibilities and preferences.  Autonomy over their work and schedules was sought:  *Now that I’ve got over 20 years of experience behind me, I can now go “yep!” I want to do it this way and I want to work this way and I want to work with these type of people and I want to do this type of job.* [OMGT1]  *…I’ve always been a bit of a “not want to follow a structured path”….although, I’m of that generation where people were told to stay in one job and collect a nice gold watch at the end of it, I’ve never been like that.  I’ve just sort of tripped over things and worked really, really hard, and been very loyal and reliable and very client-focused…and, it works.* [MKT1]  Flexibility in their work arrangements was important, allowing them to balance their professional commitments with their personal life:  *…having a young family, I couldn’t do the hours that I did in industry anymore.* [MKT2]  *…kids… I really don’t want to be full-time 24/7 in the corporate office.* [HRM2]  *…there have been some family developments…I’ve also got a dog that’s unwell…I need to be able to be very flexible, agile and closer to home.* [OMGT1]  …*being able to keep my hand in and still be involved but be able to do it at a time that suits me..*.*still being able to earn a little bit of money, a bit of pin money…allowing me to take off on a trip here and there.* [FIN1]  A sense of purpose and fulfilment was desired, aligned with their personal values and goals:  *…to be able to say at the end of the day I contributed something positive to humanity when I clocked off and went home. That’s sort of what’s driven my career selection points over time.* [OMGT1]  *…we have a responsibility to guide the students…the feedback from students is one of appreciation. And that’s very… rewarding when a student comes back to you and says, hey I haven’t had this sort of feedback previously and I really appreciate you offering that.* [MKT3]  *…I enjoy teaching. I enjoy the discussion... I have a real attachment to that... it’s relevant so you continue to stay interested.* [MKT3]  … *I enjoy working with the students…interacting…they come from so many different backgrounds…you just learn so much from them*. [FIN1]  …*I’m in industry on a daily basis dealing with practical finance issues…to be able to relate my experience to students…it’s a very positive experience.* [FIN2]  *…I have a very hectic job [in industry]…I see teaching and serving on boards as outlets for me to contribute.* [FIN2]  Some participants, particularly older individuals, felt that age-related factors influenced their decision to work as an iPro, providing them with a more accommodating lifestyle:  *…I think there’s a lot of ageism going on… I’m being locked out of the labour market because I’m old…* *I wouldn’t be doing this if [the institute] would offer me a [permanent role] today…but you've got to wait and do the best with what you've got.  It's kind of working for me right now.* [HRM1]  *[At] my age… I really don’t want to be full-time 24/7 in the corporate office.* [HRM2] | |
