# Supplementary material
Source: Research Square preprint supplement (doi:10.21203/rs.3.rs-6857172/v1)
Supplement: Supplementary file 5 [file d869fab4f8d54d781b354c8a.docx]

**IPROs Supplementary Table 4**

| Theme 4: Career Satisfaction | |
| --- | --- |
| Benefits | **Challenges** |
| Participants saw three major benefits in iPro work.   1. Freedom and autonomy:   *…getting away from hierarchical organisations that are just so bureaucratic…it’s a free-thinking way of working…getting involved in this kind of work you know you own it, it’s yours to create…you do the work that you want to be doing.* [OMGT1]   1. Flexibility in where and when they work:   *…I’m going away for a week in June but it’s no drama to just pick up a laptop, your headset and a good Wi-Fi connection and you can do this from anywhere.* [OMGT1]  *…it’s not 9-5, I don’t have to go to the office, I’m not sitting in a cubicle. If I want to go sit in my backyard and have a Zoom session with a student, awesome.* [OMGT1]  *…I can work weekends, I can work evenings…I can do things in my lunch break*. [MKT3]  …*being able to keep my hand in and still be involved but being able to do it at a time that suits me*. [FIN1]   1. A sense of personal satisfaction:   *…students look up to what you’re saying and in many respects, you’re working as a leader, as a mentor…* [MKT3] | The biggest challenge participants experienced was a lack of job security:  *…you don’t ever hear…if you’re getting future work or not.  You hope you do but they very much keep you as a contingent worker, so everything is on their terms – they’re not looking at your needs or requirements at all.* [HRM2]  *You’re always just a student complaint…a look sideways at a supervisor…[and] you have to go find somewhere else [to work]. It's really precarious…* [HRM1]  The lack of security had implications for planning personal budgets and commitments:  *...you’ve really got to be smart about how you manage money, that’s something that not everyone has got…* [OMGT1]  *…we’re planning a holiday where my wife’s going to get cheap airfares…and if it appears that I’m not doing anything, then I’ll book and join them.* [HRM1]  In addition, some participants expressed concern about the amount they were paid as an OLF in tertiary education:  *…each time I look at a contract and go, “Is it really worth the hassle for the money?”, in terms of the amount of grading you’ve got to do…essentially, if I’m going to do it, I want to do it really well.  So, my hourly rate is not reflected by the time I put in … I don’t think any educator’s time is ever …* [MKT2]  However, participants managed these challenges by being very strategic around contracts:  *…[you need to consider the challenges of] how do you find work, then how do you keep that work, and how does it work for you?* [HRM2]  *…you can’t make a full-time living out of it without being really super focused, strategic and targeted in how you construct all this stuff and put it together to make it work.* [OMGT1]  *…you're constantly having to have portfolios.* [HRM1]  *…you’ve got to be very I think creative about how you put these types of contracts together…* [OMGT1] |
| Enjoyment | **Downsides** |
| Participants enjoyed the flexibility of working online:  *…with the exception of facilitated webinars….everything else I do in my own time...last year I was overseas…I was also marking assignments…so, I just sat at my desk in my Air BnB of a night and marked.* [OMGT3]  They enjoyed engaging with students and their learning as mature working adults:  *I adore students. I really get a kick out of them learning, them being able to apply the knowledge and ideas in their workplace, and when the penny drops and an idea kind of takes hold in their mind. I know how much I enjoy and find that fulfilling…To be honest, I’d do it for free.* [OMGT2]  They also enjoyed the stimulation and opportunity for their own learning and professional development:  *I get insights into how to deal with issues now. I’m probably learning as much as they are…I’m also learning what works in terms of education…I’m listening now and drawing people’s experiences out of them…I like that I’m getting skills in online delivery.* [OMGT3]  *…it does keep you more relevant in the HR/people area… if you’re teaching at uni level…it’s good for your status and your brand.* [HRM2] | In discussing downsides, participants expressed a sense of isolation associated with working as an OLF, although teaching team meetings helped:  *I feel a little bit isolated in a way. Removed from everything as an OLF….I miss that camaraderie…walking up to the photocopier…I definitely miss that.* [MKT1]  ..*I really miss the opportunity to interact with colleagues…working form home…I find it very isolating.* [FIN 1]  *…I do like the fact that you have some team meetings because it can be quite isolating teaching online*. [MKT2]  *I know my own OLFs love the weekly catch-up because they get a chance not only to interact with each other, get to know each other, but it’s a chance to sort of reduce those feelings of isolation.* [MKT1]  *Because you’re not part of the organisation, you’re working in an isolated way….You’re not really part of the group…. You really don’t have a lot of allegiances, so it can be quite lonely and isolating*. [HRM2]  They also expressed frustration with managing technical challenges while teaching and needing to be available 24/7 in online environments, especially for international students in different time zones.  *...last night…we had a few technical problems as did students…I’m not a fan of PowerPoint because you’ve got to manage the presentation…all the little boxes at the top…and, then the internet’s about to crash…*[MKT1]  *…working with international students means that you can still be …pottering around at midnight…and, there’s been occasions where student issues have been so urgent…I’ve been on deck at 4.30 or 5.00 in the morning.* [OMGT1]  One participant also mentioned the cost of professional development and need to allocate time to administrative tasks as a downside of iPro work:  *… you’ve got to pay for everything yourself…professional development is very expensive… [also] the rigours and rigmarole of tax …I just want to work around my kids, but instead, I have to spend four to six hours a week just doing admin and processes because the government wants to make it hard for business.* [HRM2] |
